# Supplementary material for: Assessment of Inter-observer Reproducibility of Radiomic Features in Multiparametric Magnetic Resonance Imaging of Endometrial Cancer
Source: Research Square preprint supplement (doi:10.21203/rs.3.rs-8184695/v1), 2025-12-08
Supplement: Supplementary file 1 [file 47edff8fdd10cc8060635dda.docx]

**Supplementary Material A**

CE-T1W Portal venous phase

| Features | Sequence | ICC | ICC LB 95CI | ICC UB 95CI |
| --- | --- | --- | --- | --- |
| First Order |  |  |  |  |
| FO_10th percentile | CE-T1W | 0,995 | 0,985 | 0,998 |
| FO_90th percentile | CE-T1W | 0,986 | 0,949 | 0,995 |
| FO_Energy | CE-T1W | 0,953 | 0,898 | 0,978 |
| FO_Entropy | CE-T1W | 0,988 | 0,952 | 0,996 |
| FO_IQR | CE-T1W | 0,939 | 0,857 | 0,972 |
| FO_Kurtosis | CE-T1W | 0,903 | 0,833 | 0,949 |
| FO_MAD | CE-T1W | 0,956 | 0,875 | 0,982 |
| FO_Maximum | CE-T1W | 0,981 | 0,945 | 0,992 |
| FO_Mean | CE-T1W | 0,989 | 0,962 | 0,996 |
| FO_Median | CE-T1W | 0,987 | 0,958 | 0,995 |
| FO_Minimum | CE-T1W | 0,998 | 0,996 | 0,999 |
| FO_Range | CE-T1W | 0,962 | 0,890 | 0,984 |
| FO_Robust MAD | CE-T1W | 0,946 | 0,861 | 0,976 |
| FO_Root Mean Squared | CE-T1W | 0,989 | 0,959 | 0,996 |
| FO_Skewness | CE-T1W | 0,885 | 0,802 | 0,939 |
| FO_Total Energy | CE-T1W | 0,948 | 0,887 | 0,976 |
| FO_Uniformity | CE-T1W | 0,992 | 0,982 | 0,997 |
| FO_Variance | CE-T1W | 0,910 | 0,796 | 0,959 |
| Gray Level Co-occurrence Matrix |  |  |  |  |
| GLCM_Autocorrelation | CE-T1W | 0,929 | 0,796 | 0,971 |
| GLCM_Cluster prominence | CE-T1W | 0,792 | 0,635 | 0,890 |
| GLCM_Cluster shade | CE-T1W | 0,911 | 0,845 | 0,939 |
| GLCM_Cluster tendency | CE-T1W | 0,871 | 0,726 | 0,939 |
| GLCM_Contrast | CE-T1W | 0,984 | 0,968 | 0,992 |
| GLCM_Correlation | CE-T1W | 0,834 | 0,593 | 0,927 |
| GLCM_Difference average | CE-T1W | 0,992 | 0,985 | 0,996 |
| GLCM_Difference entropy | CE-T1W | 0,997 | 0,994 | 0,998 |
| GLCM_Difference variance | CE-T1W | 0,983 | 0,968 | 0,992 |
| GLCM_Id | CE-T1W | 0,999 | 0,997 | 0,999 |
| GLCM_Idm | CE-T1W | 0,999 | 0,998 | 0,999 |
| GLCM_Idmn | CE-T1W | 0,879 | 0,745 | 0,942 |
| GLCM_Idn | CE-T1W | 0,931 | 0,836 | 0,969 |
| GLCM_Imc1 | CE-T1W | 0,943 | 0,899 | 0,970 |
| GLCM_Imc2 | CE-T1W | 0,960 | 0,922 | 0,980 |
| GLCM_Inverse variance | CE-T1W | 0,995 | 0,990 | 0,997 |
| GLCM_Joint average | CE-T1W | 0,952 | 0,843 | 0,981 |
| GLCM_Joint energy | CE-T1W | 0,989 | 0,980 | 0,994 |
| GLCM_Joint entropy | CE-T1W | 0,986 | 0,951 | 0,995 |
| GLCM_Maximum probability | CE-T1W | 0,989 | 0,978 | 0,994 |
| GLCM_MCC | CE-T1W | 0,850 | 0,641 | 0,933 |
| GLCM_Sum average | CE-T1W | 0,952 | 0,843 | 0,981 |
| GLCM_Sum entropy | CE-T1W | 0,981 | 0,923 | 0,993 |
| GLCM_Sum squares | CE-T1W | 0,892 | 0,767 | 0,950 |
| Gray Level Dependence Matrix |  |  |  |  |
| GLDM_Dependence entropy | CE-T1W | 0,947 | 0,829 | 0,979 |
| GLDM_Dependence non uniformity | CE-T1W | 0,989 | 0,972 | 0,995 |
| GLDM_Dependence non uniformity normalized | CE-T1W | 0,995 | 0,990 | 0,997 |
| GLDM_Dependence variance | CE-T1W | 0,996 | 0,994 | 0,998 |
| GLDM_Gray level non uniformity | CE-T1W | 1,000 | 0,999 | 1,000 |
| GLDM_Gray level variance | CE-T1W | 0,910 | 0,790 | 0,959 |
| GLDM_High gray level emphasis | CE-T1W | 0,932 | 0,802 | 0,972 |
| GLDM_Large dependence emphasis | CE-T1W | 0,999 | 0,999 | 1,000 |
| GLDM_Large dependence high gray level emphasis | CE-T1W | 0,944 | 0,848 | 0,976 |
| GLDM_Large dependence low gray level emphasis | CE-T1W | 0,997 | 0,995 | 0,999 |
| GLDM_Low gray level emphasis | CE-T1W | 0,993 | 0,983 | 0,997 |
| GLDM_Small dependence emphasis | CE-T1W | 0,993 | 0,987 | 0,997 |
| GLDM_Small dependence high gray level emphasis | CE-T1W | 0,942 | 0,854 | 0,975 |
| GLDM_Small dependence low gray level emphasis | CE-T1W | 0,851 | 0,734 | 0,923 |
| Gray Level Run Length Matrix |  |  |  |  |
| GLRLM_Gray level non uniformity | CE-T1W | 1,000 | 0,999 | 1,000 |
| GLRLM_Gray level non uniformity normalized | CE-T1W | 0,992 | 0,980 | 0,996 |
| GLRLM_Gray level variance | CE-T1W | 0,912 | 0,800 | 0,960 |
| GLRLM_High gray level run emphasis | CE-T1W | 0,932 | 0,802 | 0,972 |
| GLRLM_Long run emphasis | CE-T1W | 0,999 | 0,997 | 0,999 |
| GLRLM_Long run high gray level emphasis | CE-T1W | 0,930 | 0,792 | 0,972 |
| GLRLM_Long run low gray level emphasis | CE-T1W | 0,996 | 0,992 | 0,998 |
| GLRLM_Low gray level run emphasis | CE-T1W | 0,991 | 0,980 | 0,996 |
| GLRLM_Run entropy | CE-T1W | 0,967 | 0,866 | 0,988 |
| GLRLM_Run length non uniformity | CE-T1W | 0,989 | 0,976 | 0,995 |
| GLRLM_Run length non uniformity normalized | CE-T1W | 0,999 | 0,999 | 1,000 |
| GLRLM_Run percentage | CE-T1W | 1,000 | 0,999 | 1,000 |
| GLRLM_Run variance | CE-T1W | 0,999 | 0,997 | 0,999 |
| GLRLM_Short run emphasis | CE-T1W | 0,999 | 0,998 | 1,000 |
| GLRLM_Short run high gray level emphasis | CE-T1W | 0,932 | 0,803 | 0,972 |
| GLRLM_Short run low gray level emphasis | CE-T1W | 0,980 | 0,954 | 0,991 |
| Gray Level Size Zone Matrix |  |  |  |  |
| GLSZM_Gray level non uniformity | CE-T1W | 0,972 | 0,950 | 0,986 |
| GLSZM_Gray level non uniformity normalized | CE-T1W | 0,921 | 0,862 | 0,959 |
| GLSZM_Gray level variance | CE-T1W | 0,937 | 0,839 | 0,973 |
| GLSZM_High gray level zone emphasis | CE-T1W | 0,938 | 0,810 | 0,975 |
| GLSZM_Large area emphasis | CE-T1W | 0,988 | 0,987 | 0,994 |
| GLSZM_Large area high gray level emphasis | CE-T1W | 0,973 | 0,951 | 0,986 |
| GLSZM_Large area low gray level emphasis | CE-T1W | 0,995 | 0,991 | 0,998 |
| GLSZM_Low gray level zone emphasis | CE-T1W | 0,975 | 0,953 | 0,987 |
| GLSZM_Size zone non uniformity | CE-T1W | 0,964 | 0,923 | 0,983 |
| GLSZM_Size zone non uniformity normalized | CE-T1W | 0,953 | 0,901 | 0,978 |
| GLSZM_Small area emphasis | CE-T1W | 0,934 | 0,873 | 0,968 |
| GLSZM_Small area high gray level emphasis | CE-T1W | 0,950 | 0,854 | 0,980 |
| GLSZM_Small area low gray level emphasis | CE-T1W | 0,969 | 0,938 | 0,985 |
| GLSZM_Zone entropy | CE-T1W | 0,956 | 0,842 | 0,983 |
| GLSZM_Zone percentage | CE-T1W | 0,992 | 0,986 | 0,996 |
| GLSZM_Zone variance | CE-T1W | 0,988 | 0,987 | 0,994 |
| Neighbouring Gray Tone Dependence Matrix |  |  |  |  |
| NGTDM_Busyness | CE-T1W | 0,988 | 0,978 | 0,994 |
| NGTDM_Coarseness | CE-T1W | 0,923 | 0,861 | 0,960 |
| NGTDM_Complexity | CE-T1W | 0,942 | 0,864 | 0,974 |
| NGTDM_Contrast | CE-T1W | 0,975 | 0,954 | 0,987 |
| NGTDM_Strength | CE-T1W | 0,940 | 0,891 | 0,969 |
| Shape |  |  |  |  |
| Sh_Elongation | CE-T1W | 0,764 | 0,617 | 0,870 |
| Sh_Flatness | CE-T1W | 0,806 | 0,687 | 0,894 |
| Sh_Least Axis Length | CE-T1W | 0,989 | 0,969 | 0,995 |
| Sh_Major Axis Length | CE-T1W | 0,988 | 0,973 | 0,995 |
| Sh_Max. 2D diameter column | CE-T1W | 0,984 | 0,970 | 0,992 |
| Sh_Maximum 2D diameter row | CE-T1W | 0,986 | 0,974 | 0,993 |
| Sh_Maximum 2D diameter slice | CE-T1W | 0,985 | 0,967 | 0,993 |
| Sh_Maximum 3D diameter | CE-T1W | 0,986 | 0,971 | 0,994 |
| Sh_Mesh volume | CE-T1W | 0,997 | 0,995 | 0,999 |
| Sh_Minor axis length | CE-T1W | 0,990 | 0,977 | 0,995 |
| Sh_Sphericity | CE-T1W | 0,816 | 0,621 | 0,912 |
| Sh_Surface area | CE-T1W | 0,998 | 0,996 | 0,999 |
| Sh_Surface volume ratio | CE-T1W | 0,914 | 0,696 | 0,968 |
| Sh_Voxel volume | CE-T1W | 0,997 | 0,995 | 0,999 |

T2

| Features | Sequence | ICC | ICC LB 95CI | ICC UB 95CI |
| --- | --- | --- | --- | --- |
| First order |  |  |  |  |
| FO_10th percentile | T2W | 0,982 | 0,967 | 0,991 |
| FO_90th percentile | T2W | 0,996 | 0,994 | 0,998 |
| FO_Energy | T2W | 0,993 | 0,986 | 0,996 |
| FO_Entropy | T2W | 0,980 | 0,964 | 0,990 |
| FO_IQR | T2W | 0,898 | 0,823 | 0,946 |
| FO_Kurtosis | T2W | 0,865 | 0,770 | 0,928 |
| FO_MAD | T2W | 0,940 | 0,893 | 0,969 |
| FO_Maximum | T2W | 0,994 | 0,989 | 0,997 |
| FO_Mean | T2W | 0,986 | 0,971 | 0,994 |
| FO_Median | T2W | 0,962 | 0,890 | 0,984 |
| FO_Minimum | T2W | 0,968 | 0,943 | 0,984 |
| FO_Range | T2W | 0,962 | 0,933 | 0,981 |
| FO_Robust MAD | T2W | 0,962 | 0,933 | 0,981 |
| FO_Root Mean Squared | T2W | 0,994 | 0,989 | 0,997 |
| FO_Skewness | T2W | 0,839 | 0,709 | 0,917 |
| FO_Total Energy | T2W | 0,992 | 0,986 | 0,996 |
| FO_Uniformity | T2W | 0,991 | 0,983 | 0,995 |
| FO_Variance | T2W | 0,904 | 0,833 | 0,950 |
| Gray Level Co-occurence Matrix |  |  |  |  |
| GLCM_Autocorrelation | T2W | 0,895 | 0,818 | 0,945 |
| GLCM_Cluster prominence | T2W | 0,861 | 0,764 | 0,926 |
| GLCM_Cluster shade | T2W | 0,884 | 0,800 | 0,939 |
| GLCM_Cluster tendency | T2W | 0,920 | 0,860 | 0,958 |
| GLCM_Contrast | T2W | 0,952 | 0,914 | 0,975 |
| GLCM_Correlation | T2W | 0,921 | 0,861 | 0,958 |
| GLCM_Difference average | T2W | 0,963 | 0,933 | 0,981 |
| GLCM_Difference entropy | T2W | 0,975 | 0,951 | 0,988 |
| GLCM_Difference variance | T2W | 0,956 | 0,922 | 0,977 |
| GLCM_Id | T2W | 0,977 | 0,959 | 0,988 |
| GLCM_Idm | T2W | 0,978 | 0,961 | 0,989 |
| GLCM_Idmn | T2W | 0,898 | 0,824 | 0,946 |
| GLCM_Idn | T2W | 0,924 | 0,866 | 0,960 |
| GLCM_Imc1 | T2W | 0,885 | 0,799 | 0,940 |
| GLCM_Imc2 | T2W | 0,968 | 0,942 | 0,983 |
| GLCM_Inverse variance | T2W | 0,962 | 0,931 | 0,980 |
| GLCM_Joint average | T2W | 0,935 | 0,885 | 0,966 |
| GLCM_Joint energy | T2W | 0,985 | 0,972 | 0,992 |
| GLCM_Joint entropy | T2W | 0,977 | 0,951 | 0,989 |
| GLCM_Maximum probability | T2W | 0,979 | 0,961 | 0,989 |
| GLCM_MCC | T2W | 0,915 | 0,830 | 0,958 |
| GLCM_Sum average | T2W | 0,935 | 0,885 | 0,966 |
| GLCM_Sum entropy | T2W | 0,977 | 0,955 | 0,988 |
| GLCM_Sum squares | T2W | 0,938 | 0,889 | 0,968 |
| Gray Level Dependence Matrix |  |  |  |  |
| GLDM_Dependence entropy | T2W | 0,951 | 0,911 | 0,975 |
| GLDM_Dependence non uniformity | T2W | 0,997 | 0,995 | 0,999 |
| GLDM_Dependence non uniformity normalized | T2W | 0,915 | 0,851 | 0,955 |
| GLDM_Dependence variance | T2W | 0,985 | 0,973 | 0,992 |
| GLDM_Gray level non uniformity | T2W | 0,999 | 0,998 | 1,000 |
| GLDM_Gray level variance | T2W | 0,904 | 0,833 | 0,950 |
| GLDM_High gray level emphasis | T2W | 0,903 | 0,830 | 0,949 |
| GLDM_Large dependence emphasis | T2W | 0,993 | 0,986 | 0,996 |
| GLDM_Large dependence high gray level emphasis | T2W | 0,907 | 0,838 | 0,951 |
| GLDM_Large dependence low gray level emphasis | T2W | 0,899 | 0,825 | 0,946 |
| GLDM_Low gray level emphasis | T2W | 0,730 | 0,572 | 0,849 |
| GLDM_Small dependence emphasis | T2W | 0,957 | 0,923 | 0,978 |
| GLDM_Small dependence high gray level emphasis | T2W | 0,927 | 0,871 | 0,962 |
| GLDM_Small dependence low gray level emphasis | T2W | 0,801 | 0,671 | 0,892 |
| Gray Level Run Length Matrix |  |  |  |  |
| GLRLM_Gray level non uniformity | T2W | 0,999 | 0,998 | 1,000 |
| GLRLM_Gray level non uniformity normalized | T2W | 0,991 | 0,984 | 0,995 |
| GLRLM_Gray level variance | T2W | 0,905 | 0,835 | 0,950 |
| GLRLM_High gray level run emphasis | T2W | 0,903 | 0,832 | 0,949 |
| GLRLM_Long run emphasis | T2W | 0,993 | 0,987 | 0,996 |
| GLRLM_Long run high gray level emphasis | T2W | 0,889 | 0,808 | 0,941 |
| GLRLM_Long run low gray level emphasis | T2W | 0,755 | 0,607 | 0,864 |
| GLRLM_Low gray level run emphasis | T2W | 0,738 | 0,582 | 0,853 |
| GLRLM_Run entropy | T2W | 0,966 | 0,940 | 0,983 |
| GLRLM_Run length non uniformity | T2W | 0,998 | 0,997 | 0,999 |
| GLRLM_Run length non uniformity normalized | T2W | 0,954 | 0,918 | 0,976 |
| GLRLM_Run percentage | T2W | 0,964 | 0,936 | 0,982 |
| GLRLM_Run variance | T2W | 0,984 | 0,970 | 0,992 |
| GLRLM_Short run emphasis | T2W | 0,972 | 0,950 | 0,986 |
| GLRLM_Short run high gray level emphasis | T2W | 0,905 | 0,835 | 0,950 |
| GLRLM_Short run low gray level emphasis | T2W | 0,724 | 0,562 | 0,845 |
| Gray Level Size Zone Matrix |  |  |  |  |
| GLSZM_Gray level non uniformity | T2W | 0,987 | 0,976 | 0,993 |
| GLSZM_Gray level non uniformity normalized | T2W | 0,977 | 0,958 | 0,988 |
| GLSZM_Gray level variance | T2W | 0,913 | 0,848 | 0,954 |
| GLSZM_High gray level zone emphasis | T2W | 0,913 | 0,848 | 0,954 |
| GLSZM_Large area emphasis | T2W | 0,990 | 0,981 | 0,995 |
| GLSZM_Large area high gray level emphasis | T2W | 0,995 | 0,991 | 0,998 |
| GLSZM_Large area low gray level emphasis | T2W | 0,938 | 0,891 | 0,968 |
| GLSZM_Low gray level zone emphasis | T2W | 0,859 | 0,762 | 0,925 |
| GLSZM_Size zone non uniformity | T2W | 0,972 | 0,949 | 0,986 |
| GLSZM_Size zone non uniformity normalized | T2W | 0,938 | 0,891 | 0,968 |
| GLSZM_Small area emphasis | T2W | 0,940 | 0,893 | 0,969 |
| GLSZM_Small area high gray level emphasis | T2W | 0,918 | 0,856 | 0,957 |
| GLSZM_Small area low gray level emphasis | T2W | 0,822 | 0,704 | 0,904 |
| GLSZM_Zone entropy | T2W | 0,966 | 0,935 | 0,983 |
| GLSZM_Zone percentage | T2W | 0,962 | 0,933 | 0,981 |
| GLSZM_Zone variance | T2W | 0,991 | 0,983 | 0,995 |
| Neighbouring Gray Tone Dependence Matrix |  |  |  |  |
| NGTDM_Busyness | T2W | 0,912 | 0,847 | 0,954 |
| NGTDM_Coarseness | T2W | 0,953 | 0,916 | 0,976 |
| NGTDM_Complexity | T2W | 0,930 | 0,833 | 0,949 |
| NGTDM_Contrast | T2W | 0,882 | 0,798 | 0,938 |
| NGTDM_Strength | T2W | 0,912 | 0,844 | 0,954 |
| Shape |  |  |  |  |
| Sh_Elongation | T2W | 0,548 | 0,340 | 0,730 |
| Sh_Flatness | T2W | 0,707 | 0,539 | 0,834 |
| Sh_Least Axis Length | T2W | 0,966 | 0,937 | 0,983 |
| Sh_Major Axis Length | T2W | 0,992 | 0,985 | 0,996 |
| Sh_Max. 2D diameter column | T2W | 0,981 | 0,962 | 0,991 |
| Sh_Maximum 2D diameter row | T2W | 0,990 | 0,981 | 0,995 |
| Sh_Maximum 2D diameter slice | T2W | 0,990 | 0,982 | 0,995 |
| Sh_Maximum 3D diameter | T2W | 0,991 | 0,983 | 0,995 |
| Sh_Mesh volume | T2W | 0,999 | 0,998 | 0,999 |
| Sh_Minor axis length | T2W | 0,981 | 0,963 | 0,990 |
| Sh_Sphericity | T2W | 0,781 | 0,643 | 0,880 |
| Sh_Surface area | T2W | 0,998 | 0,996 | 0,999 |
| Sh_Surface volume ratio | T2W | 0,921 | 0,856 | 0,959 |
| Sh_Voxel volume | T2W | 0,999 | 0,998 | 0,999 |

DWI

| Features | Sequence | ICC | ICC LB 95CI | ICC UB 95CI |
| --- | --- | --- | --- | --- |
| First order |  |  |  |  |
| FO_10th percentile | DWI | 0,983 | 0,955 | 0,993 |
| FO_90th percentile | DWI | 1,000 | 0,999 | 1,000 |
| FO_Energy | DWI | 0,996 | 0,992 | 0,998 |
| FO_Entropy | DWI | 0,979 | 0,928 | 0,992 |
| FO_IQR | DWI | 0,989 | 0,973 | 0,995 |
| FO_Kurtosis | DWI | 0,794 | 0,660 | 0,887 |
| FO_MAD | DWI | 0,991 | 0,979 | 0,996 |
| FO_Maximum | DWI | 1,000 | 1,000 | 1,000 |
| FO_Mean | DWI | 0,996 | 0,989 | 0,998 |
| FO_Median | DWI | 0,993 | 0,985 | 0,997 |
| FO_Minimum | DWI | 0,928 | 0,855 | 0,965 |
| FO_Range | DWI | 0,986 | 0,971 | 0,994 |
| FO_Robust MAD | DWI | 0,990 | 0,992 | 0,999 |
| FO_Root Mean Squared | DWI | 0,997 | 0,992 | 0,999 |
| FO_Skewness | DWI | 0,843 | 0,736 | 0,915 |
| FO_Total Energy | DWI | 0,996 | 0,992 | 0,998 |
| FO_Uniformity | DWI | 0,981 | 0,955 | 0,991 |
| FO_Variance | DWI | 0,992 | 0,985 | 0,996 |
| Gray Level Co-occurrence Matrix |  |  |  |  |
| GLCM_Autocorrelation | DWI | 0,931 | 0,879 | 0,964 |
| GLCM_Cluster prominence | DWI | 0,948 | 0,908 | 0,973 |
| GLCM_Cluster shade | DWI | 0,693 | 0,520 | 0,826 |
| GLCM_Cluster tendency | DWI | 0,988 | 0,978 | 0,994 |
| GLCM_Contrast | DWI | 0,998 | 0,995 | 0,999 |
| GLCM_Correlation | DWI | 0,847 | 0,733 | 0,919 |
| GLCM_Difference average | DWI | 0,989 | 0,978 | 0,995 |
| GLCM_Difference entropy | DWI | 0,977 | 0,939 | 0,990 |
| GLCM_Difference variance | DWI | 0,997 | 0,994 | 0,998 |
| GLCM_Id | DWI | 0,987 | 0,971 | 0,994 |
| GLCM_Idm | DWI | 0,988 | 0,973 | 0,994 |
| GLCM_Idmn | DWI | 0,860 | 0,760 | 0,825 |
| GLCM_Idn | DWI | 0,921 | 0,861 | 0,958 |
| GLCM_Imc1 | DWI | 0,926 | 0,843 | 0,965 |
| GLCM_Imc2 | DWI | 0,956 | 0,918 | 0,977 |
| GLCM_Inverse variance | DWI | 0,955 | 0,900 | 0,979 |
| GLCM_Joint average | DWI | 0,981 | 0,948 | 0,986 |
| GLCM_Joint energy | DWI | 0,967 | 0,939 | 0,983 |
| GLCM_Joint entropy | DWI | 0,964 | 0,857 | 0,987 |
| GLCM_Maximum probability | DWI | 0,940 | 0,893 | 0,969 |
| GLCM_MCC | DWI | 0,880 | 0,781 | 0,938 |
| GLCM_Sum average | DWI | 0,972 | 0,948 | 0,986 |
| GLCM_Sum entropy | DWI | 0,959 | 0,872 | 0,984 |
| GLCM_Sum squares | DWI | 0,992 | 0,985 | 0,996 |
| Gray Level Dependence Matrix |  |  |  |  |
| GLDM_Dependence entropy | DWI | 0,952 | 0,853 | 0,981 |
| GLDM_Dependence non uniformity | DWI | 0,972 | 0,930 | 0,988 |
| GLDM_Dependence non uniformity normalized | DWI | 0,974 | 0,954 | 0,987 |
| GLDM_Dependence variance | DWI | 0,967 | 0,940 | 0,983 |
| GLDM_Gray level non uniformity | DWI | 0,999 | 0,998 | 1,000 |
| GLDM_Gray level variance | DWI | 0,992 | 0,985 | 0,996 |
| GLDM_High gray level emphasis | DWI | 0,945 | 0,902 | 0,971 |
| GLDM_Large dependence emphasis | DWI | 0,975 | 0,956 | 0,987 |
| GLDM_Large dependence high gray level emphasis | DWI | 0,944 | 0,898 | 0,971 |
| GLDM_Large dependence low gray level emphasis | DWI | 0,799 | 0,668 | 0,891 |
| GLDM_Low gray level emphasis | DWI | 0,869 | 0,775 | 0,931 |
| GLDM_Small dependence emphasis | DWI | 0,981 | 0,947 | 0,986 |
| GLDM_Small dependence high gray level emphasis | DWI | 0,941 | 0,985 | 0,969 |
| GLDM_Small dependence low gray level emphasis | DWI | 0,586 | 0,384 | 0,756 |
| Gray Level Run Length Matrix |  |  |  |  |
| GLRLM_Gray level non uniformity | DWI | 0,999 | 0,997 | 0,999 |
| GLRLM_Gray level non uniformity normalized | DWI | 0,985 | 0,957 | 0,994 |
| GLRLM_Gray level variance | DWI | 0,992 | 0,985 | 0,996 |
| GLRLM_High gray level run emphasis | DWI | 0,945 | 0,902 | 0,971 |
| GLRLM_Long run emphasis | DWI | 0,980 | 0,965 | 0,990 |
| GLRLM_Long run high gray level emphasis | DWI | 0,945 | 0,902 | 0,971 |
| GLRLM_Long run low gray level emphasis | DWI | 0,861 | 0,762 | 0,925 |
| GLRLM_Low gray level run emphasis | DWI | 0,858 | 0,759 | 0,925 |
| GLRLM_Run entropy | DWI | 0,965 | 0,870 | 0,987 |
| GLRLM_Run length non uniformity | DWI | 0,960 | 0,909 | 0,982 |
| GLRLM_Run length non uniformity normalized | DWI | 0,986 | 0,975 | 0,993 |
| GLRLM_Run percentage | DWI | 0,985 | 0,973 | 0,992 |
| GLRLM_Run variance | DWI | 0,983 | 0,969 | 0,991 |
| GLRLM_Short run emphasis | DWI | 0,982 | 0,967 | 0,991 |
| GLRLM_Short run high gray level emphasis | DWI | 0,945 | 0,902 | 0,971 |
| GLRLM_Short run low gray level emphasis | DWI | 0,823 | 0,704 | 0,904 |
| Gray Level Size Zone Matrix |  |  |  |  |
| GLSZM_Gray level non uniformity | DWI | 0,896 | 0,799 | 0,948 |
| GLSZM_Gray level non uniformity normalized | DWI | 0,984 | 0,967 | 0,992 |
| GLSZM_Gray level variance | DWI | 0,993 | 0,988 | 0,997 |
| GLSZM_High gray level zone emphasis | DWI | 0,945 | 0,903 | 0,972 |
| GLSZM_Large area emphasis | DWI | 0,924 | 0,867 | 0,960 |
| GLSZM_Large area high gray level emphasis | DWI | 0,918 | 0,857 | 0,957 |
| GLSZM_Large area low gray level emphasis | DWI | 0,914 | 0,848 | 0,956 |
| GLSZM_Low gray level zone emphasis | DWI | 0,913 | 0,848 | 0,955 |
| GLSZM_Size zone non uniformity | DWI | 0,949 | 0,902 | 0,975 |
| GLSZM_Size zone non uniformity normalized | DWI | 0,876 | 0,783 | 0,935 |
| GLSZM_Small area emphasis | DWI | 0,842 | 0,733 | 0,916 |
| GLSZM_Small area high gray level emphasis | DWI | 0,943 | 0,900 | 0,971 |
| GLSZM_Small area low gray level emphasis | DWI | 0,377 | 0,154 | 0,600 |
| GLSZM_Zone entropy | DWI | 0,949 | 0,836 | 0,980 |
| GLSZM_Zone percentage | DWI | 0,977 | 0,958 | 0,988 |
| GLSZM_Zone variance | DWI | 0,926 | 0,870 | 0,961 |
| Neighbouring Gray Tone Dependence Matrix |  |  |  |  |
| NGTDM_Busyness | DWI | 0,768 | 0,624 | 0,872 |
| NGTDM_Coarseness | DWI | 0,967 | 0,931 | 0,984 |
| NGTDM_Complexity | DWI | 0,978 | 0,961 | 0,989 |
| NGTDM_Contrast | DWI | 0,956 | 0,922 | 0,977 |
| NGTDM_Strength | DWI | 0,984 | 0,972 | 0,992 |
| Shape |  |  |  |  |
| Sh_Elongation | DWI | 0,629 | 0,437 | 0,785 |
| Sh_Flatness | DWI | 0,893 | 0,810 | 0,944 |
| Sh_Least Axis Length | DWI | 0,984 | 0,911 | 0,995 |
| Sh_Major Axis Length | DWI | 0,978 | 0,958 | 0,989 |
| Sh_Max. 2D diameter column | DWI | 0,973 | 0,915 | 0,989 |
| Sh_Maximum 2D diameter row | DWI | 0,983 | 0,966 | 0,991 |
| Sh_Maximum 2D diameter slice | DWI | 0,987 | 0,981 | 0,994 |
| Sh_Maximum 3D diameter | DWI | 0,984 | 0,964 | 0,992 |
| Sh_Mesh volume | DWI | 0,993 | 0,985 | 0,997 |
| Sh_Minor axis length | DWI | 0,986 | 0,946 | 0,995 |
| Sh_Sphericity | DWI | 0,813 | 0,688 | 0,899 |
| Sh_Surface area | DWI | 0,994 | 0,979 | 0,998 |
| Sh_Surface volume ratio | DWI | 0,927 | 0,785 | 0,970 |
| Sh_Voxel volume | DWI | 0,993 | 0,985 | 0,997 |

ADC

| Features | Sequence | ICC | ICC LB 95CI | ICC UB 95CI |
| --- | --- | --- | --- | --- |
| First order |  |  |  |  |
| FO_10th percentile | ADC | 0,967 | 0,941 | 0,983 |
| FO_90th percentile | ADC | 0,900 | 0,825 | 0,948 |
| FO_Energy | ADC | 0,989 | 0,975 | 0,995 |
| FO_Entropy | ADC | 0,901 | 0,762 | 0,956 |
| FO_IQR | ADC | 0,831 | 0,705 | 0,911 |
| FO_Kurtosis | ADC | 0,735 | 0,577 | 0,852 |
| FO_MAD | ADC | 0,816 | 0,689 | 0,901 |
| FO_Maximum | ADC | 0,762 | 0,615 | 0,868 |
| FO_Mean | ADC | 0,967 | 0,942 | 0,983 |
| FO_Median | ADC | 0,980 | 0,964 | 0,990 |
| FO_Minimum | ADC | 0,849 | 0,734 | 0,921 |
| FO_Range | ADC | 0,725 | 0,556 | 0,848 |
| FO_Robust MAD | ADC | 0,796 | 0,654 | 0,891 |
| FO_Root Mean Squared | ADC | 0,946 | 0,904 | 0,972 |
| FO_Skewness | ADC | 0,870 | 0,778 | 0,931 |
| FO_Total Energy | ADC | 0,992 | 0,983 | 0,996 |
| FO_Uniformity | ADC | 0,924 | 0,845 | 0,963 |
| FO_Variance | ADC | 0,680 | 0,503 | 0,817 |
| Gray Level Co-occurance Matrix |  |  |  |  |
| GLCM_Autocorrelation | ADC | 0,687 | 0,497 | 0,826 |
| GLCM_Cluster prominence | ADC | 0,383 | 0,160 | 0,606 |
| GLCM_Cluster shade | ADC | 0,432 | 0,210 | 0,644 |
| GLCM_Cluster tendency | ADC | 0,778 | 0,639 | 0,878 |
| GLCM_Contrast | ADC | 0,708 | 0,540 | 0,835 |
| GLCM_Correlation | ADC | 0,935 | 0,886 | 0,966 |
| GLCM_Difference average | ADC | 0,861 | 0,753 | 0,928 |
| GLCM_Difference entropy | ADC | 0,819 | 0,612 | 0,915 |
| GLCM_Difference variance | ADC | 0,791 | 0,654 | 0,886 |
| GLCM_Id | ADC | 0,942 | 0,864 | 0,974 |
| GLCM_Idm | ADC | 0,927 | 0,847 | 0,965 |
| GLCM_Idmn | ADC | 0,805 | 0,679 | 0,894 |
| GLCM_Idn | ADC | 0,860 | 0,763 | 0,925 |
| GLCM_Imc1 | ADC | 0,971 | 0,921 | 0,987 |
| GLCM_Imc2 | ADC | 0,950 | 0,910 | 0,974 |
| GLCM_Inverse variance | ADC | 0,951 | 0,894 | 0,977 |
| GLCM_Joint average | ADC | 0,772 | 0,600 | 0,880 |
| GLCM_Joint energy | ADC | 0,912 | 0,826 | 0,957 |
| GLCM_Joint entropy | ADC | 0,935 | 0,784 | 0,974 |
| GLCM_Maximum probability | ADC | 0,947 | 0,891 | 0,975 |
| GLCM_MCC | ADC | 0,935 | 0,835 | 0,971 |
| GLCM_Sum average | ADC | 0,772 | 0,600 | 0,880 |
| GLCM_Sum entropy | ADC | 0,876 | 0,717 | 0,944 |
| GLCM_Sum squares | ADC | 0,764 | 0,619 | 0,870 |
| Gray Level Dependence Matrix |  |  |  |  |
| GLDM_Dependence entropy | ADC | 0,945 | 0,835 | 0,977 |
| GLDM_Dependence non uniformity | ADC | 0,988 | 0,969 | 0,995 |
| GLDM_Dependence non uniformity normalized | ADC | 0,936 | 0,888 | 0,967 |
| GLDM_Dependence variance | ADC | 0,954 | 0,918 | 0,976 |
| GLDM_Gray level non uniformity | ADC | 0,994 | 0,987 | 0,997 |
| GLDM_Gray level variance | ADC | 0,664 | 0,466 | 0,811 |
| GLDM_High gray level emphasis | ADC | 0,679 | 0,502 | 0,817 |
| GLDM_Large dependence emphasis | ADC | 0,932 | 0,880 | 0,964 |
| GLDM_Large dependence high gray level emphasis | ADC | 0,777 | 0,611 | 0,882 |
| GLDM_Large dependence low gray level emphasis | ADC | 0,947 | 0,906 | 0,973 |
| GLDM_Low gray level emphasis | ADC | 0,902 | 0,830 | 0,949 |
| GLDM_Small dependence emphasis | ADC | 0,952 | 0,915 | 0,975 |
| GLDM_Small dependence high gray level emphasis | ADC | 0,654 | 0,460 | 0,803 |
| GLDM_Small dependence low gray level emphasis | ADC | 0,944 | 0,900 | 0,971 |
| Gray Level Run Length Matrix |  |  |  |  |
| GLRLM_Gray level non uniformity | ADC | 0,994 | 0,987 | 0,997 |
| GLRLM_Gray level non uniformity normalized | ADC | 0,934 | 0,856 | 0,969 |
| GLRLM_Gray level variance | ADC | 0,674 | 0,496 | 0,814 |
| GLRLM_High gray level run emphasis | ADC | 0,663 | 0,465 | 0,811 |
| GLRLM_Long run emphasis | ADC | 0,902 | 0,831 | 0,949 |
| GLRLM_Long run high gray level emphasis | ADC | 0,667 | 0,468 | 0,814 |
| GLRLM_Long run low gray level emphasis | ADC | 0,920 | 0,859 | 0,958 |
| GLRLM_Low gray level run emphasis | ADC | 0,892 | 0,813 | 0,943 |
| GLRLM_Run entropy | ADC | 0,908 | 0,768 | 0,960 |
| GLRLM_Run length non uniformity | ADC | 0,991 | 0,980 | 0,996 |
| GLRLM_Run length non uniformity normalized | ADC | 0,932 | 0,880 | 0,964 |
| GLRLM_Run percentage | ADC | 0,922 | 0,864 | 0,959 |
| GLRLM_Run variance | ADC | 0,907 | 0,839 | 0,951 |
| GLRLM_Short run emphasis | ADC | 0,924 | 0,867 | 0,960 |
| GLRLM_Short run high gray level emphasis | ADC | 0,663 | 0,465 | 0,810 |
| GLRLM_Short run low gray level emphasis | ADC | 0,887 | 0,806 | 0,940 |
| Gray Level Size Zone Matrix |  |  |  |  |
| GLSZM_Gray level non uniformity | ADC | 0,993 | 0,984 | 0,997 |
| GLSZM_Gray level non uniformity normalized | ADC | 0,956 | 0,883 | 0,981 |
| GLSZM_Gray level variance | ADC | 0,641 | 0,454 | 0,793 |
| GLSZM_High gray level zone emphasis | ADC | 0,656 | 0,457 | 0,806 |
| GLSZM_Large area emphasis | ADC | 0,903 | 0,832 | 0,949 |
| GLSZM_Large area high gray level emphasis | ADC | 0,842 | 0,712 | 0,919 |
| GLSZM_Large area low gray level emphasis | ADC | 0,861 | 0,765 | 0,926 |
| GLSZM_Low gray level zone emphasis | ADC | 0,906 | 0,837 | 0,951 |
| GLSZM_Size zone non uniformity | ADC | 0,979 | 0,950 | 0,991 |
| GLSZM_Size zone non uniformity normalized | ADC | 0,955 | 0,920 | 0,977 |
| GLSZM_Small area emphasis | ADC | 0,957 | 0,923 | 0,978 |
| GLSZM_Small area high gray level emphasis | ADC | 0,645 | 0,447 | 0,797 |
| GLSZM_Small area low gray level emphasis | ADC | 0,936 | 0,888 | 0,967 |
| GLSZM_Zone entropy | ADC | 0,939 | 0,834 | 0,974 |
| GLSZM_Zone percentage | ADC | 0,955 | 0,920 | 0,977 |
| GLSZM_Zone variance | ADC | 0,900 | 0,827 | 0,947 |
| Neighbouring Gray Tone Dependence Matrix |  |  |  |  |
| NGTDM_Busyness | ADC | 0,868 | 0,776 | 0,930 |
| NGTDM_Coarseness | ADC | 0,928 | 0,833 | 0,967 |
| NGTDM_Complexity | ADC | 0,636 | 0,447 | 0,789 |
| NGTDM_Contrast | ADC | 0,856 | 0,757 | 0,923 |
| NGTDM_Strength | ADC | 0,772 | 0,629 | 0,874 |
| Shape |  |  |  |  |
| Sh_Elongation | ADC | 0,629 | 0,437 | 0,785 |
| Sh_Flatness | ADC | 0,893 | 0,810 | 0,944 |
| Sh_Least Axis Length | ADC | 0,984 | 0,911 | 0,995 |
| Sh_Major Axis Length | ADC | 0,978 | 0,958 | 0,989 |
| Sh_Max. 2D diameter column | ADC | 0,973 | 0,915 | 0,989 |
| Sh_Maximum 2D diameter row | ADC | 0,983 | 0,966 | 0,991 |
| Sh_Maximum 2D diameter slice | ADC | 0,987 | 0,981 | 0,994 |
| Sh_Maximum 3D diameter | ADC | 0,984 | 0,964 | 0,992 |
| Sh_Mesh volume | ADC | 0,993 | 0,985 | 0,997 |
| Sh_Minor axis length | ADC | 0,986 | 0,946 | 0,995 |
| Sh_Sphericity | ADC | 0,813 | 0,688 | 0,899 |
| Sh_Surface area | ADC | 0,994 | 0,979 | 0,998 |
| Sh_Surface volume ratio | ADC | 0,927 | 0,785 | 0,970 |
| Sh_Voxel volume | ADC | 0,993 | 0,985 | 0,997 |
