# Supplementary material for: Assessment of Inter-observer Reproducibility of Radiomic Features in Multiparametric Magnetic Resonance Imaging of Endometrial Cancer
Source: Research Square preprint supplement (doi:10.21203/rs.3.rs-8184695/v1), 2025-12-08
Supplement: Supplementary file 2 [file 4c0cb58fff1651d1bd4e04f5.xlsx]

## Sheet: Sayfa1
Low Reproducibility Across All Sequences (ICC < 0.9)		High Reproducibility Across All Sequences (ICC ≥ 0.9)
Shape	Elongation	Shape	LeastAxisLength
Shape	Sphericity	Shape	MajorAxisLength
Shape	Flatness	Shape	Maximum2DDiameterSlice
first order	Kurtosis	Shape	Maximum3DDiameter
first order	Skewness	Shape	MinorAxisLength
first order	Minimum	glcm	Id
first order	Variance	glcm	Idm
glcm	Corellation	gldm	DependenceEntropy
glcm	DifferenceVariance	gldm	LargeDependenceEmphasis
glcm	Idmn	gldm	SmallDependenceEmphasis
glcm	Idn	glrlm	GreyLevelNonUniformity
glcm	MCC	glrlm	LongRunEmphasis
gldm	GreyLevelVariance	glrlm	RunLengthNonUniformityNormalized
gldm	LowGreyLevelEmphasis	glrlm	RunPercentage
gldm	SmallDependenceLowGreyLevelEmphasis	glrlm	RunVariance
glrlm	GreyLevelVariance	glrlm	ShortRunEmphasis
glrlm	LongRunLowGreyLevelEmphasis	glszm	GreyLevelNonUniformity
glrlm	LowGreyLevelRunEmphasis	glszm	SizeZoneNonUniformity
glrlm	ShortRunLowGreyLevelRunEmphasis	glszm	ZonePercentage
glszm	GreyLevelVariance
glszm	SmallAreaLowGreyLevelEmphasis
ngtdm	Contrast
ngtdm	Strength
