# Supplementary material for: Assessment of Inter-observer Reproducibility of Radiomic Features in Multiparametric Magnetic Resonance Imaging of Endometrial Cancer
Source: Research Square preprint supplement (doi:10.21203/rs.3.rs-8184695/v1), 2025-12-08
Supplement: Supplementary file 3 [file dbe5518896d1f34afc46b96e.xlsx]

## Sheet: Sayfa1
Details about image acquisition
Vendor	Model	Patient Number	Magnetic Field Strength (T)	Center
Siemens	Avanto	51	2025-05-01	Internal
Siemens	Avanto	2	2025-05-01	External
Siemens	Amira	1	2025-05-01	External
Siemens	Aera	1	2025-05-01	External
Siemens	Essenza	1	2025-05-01	External
Siemens	Vida	1	3	External
General Electric	HDxt SIGNA	1	2025-05-01	External
General Electric	HDe Signa	1	2025-05-01	External
Details about acquisition parameters
Paremeters	T1WCE	T2W	DWI/ADC
TE (ms)	10 (10-17)	104 (76-108)	71 (61-97)
TR (ms)	716 (510-791)	4530 (2100 - 6300)	6000 (440-8600)
Flip Angle	150 (150-180)	150 (123-180)	90 (90-90)
FOV (mm)	420*420 (240-420)	280*280 (240-280)	420*420(102-420)
Slice Thickness (mm)	5 (3-5)	4.5 (3-5)	5 (3-8)
Orientation	Sagittal	Axial-Sagittal-Coronal	Axial
b-value DWI (s/ mm2)	-	-	800(55) 1000(4)
b-values ADC (s/ mm2)	-	-	0-400-800(55) 0-500-1000(4)
